# Supplementary material for: Outcomes of community-acquired pneumonia using the Pneumonia Severity Index versus the CURB-65 in routine practice of emergency departments
Source: PubMed Central journal article supplement — ERJ Open Res. 2023 May 2;9(3):00051-2023. doi: 10.1183/23120541.00051-2023 (PMC10152258; doi:10.1183/23120541.00051-2023), 2023-05-02
Supplement: 00051-2023.SUPPLEMENT.pdf [file 00051-2023.SUPPLEMENT.pdf]

## Appendix

### Outcomes defined

1. Hospitalisation: if clinical admission occurred on the day of the start of the pneumonia registration code or the day after the start of the pneumonia registration code. Calculated as a percentage of the total number of included patients.
2. ICU admission: if a patient spent any amount of time at the ICU during the total time of admission. Calculated as a percentage of the total number of included patients.
3. 30-day mortality: if a patient died within 30 days of the opening of the pneumonia registration code. Calculated as a percentage of the total number of included patients.
4. Readmission: if a patient was discharged from the hospital and readmitted later on. There had to be a minimum of 1 day and a maximum of 7 days between the discharge date and readmission date. Only readmissions linked to the initial pneumonia registration code were included. Calculated as a percentage of the total number of (delayed) admissions.
5. Delayed admission: if a patient was initially discharged from the ED but still admitted to the hospital later on, between the 2<sup>nd</sup> day and the 7<sup>th</sup> day after the opening of the pneumonia registration code. Only delayed admissions linked to the initial pneumonia registration code were included. Calculated as a percentage of the total number of initial outpatients.
6. Length of stay: adding up all days the patient was admitted, including possible ICU admission. Days spent in the hospital during readmission were not included in calculating the length of stay.

### Comorbidities

Registration codes that were started within 5 years prior to the start of the pneumonia registration code were included. For patients with a pneumonia registration code started in 2018, other registration codes were included from 2013 onward and for patients with a pneumonia registration code started in 2019, other registration codes were included from 2014 onward.

#### Neoplastic disease

Malignant tumors ear

Malignant tumor cavum oris stage I&II

Malignant tumor cavum oris stage III&IV

Malignant tumor oropharynx stage I&II

Malignant tumor oropharynx stage III&IV

Malignant tumor hypopharynx stage I&II

Malignant tumor hypopharynx stage III&IV

Malignant tumor larynx stage I&II

Malignant tumor larynx stage III&IV

Malignant tumor nasopharynx stage I&II

Malignant tumor nasopharynx stage III&IV

Malignant tumor salivary glands

Malignant tumor neck

Malignant neoplasm thyroid

Malignant neoplasm salivary glands

Malignant mammary neoplasm

Malignant neoplasm esophagus/cardia

Malignant neoplasm gallbladder

Malignant neoplasm pancreas/bile ducts

Malignant neoplasm colon  
 Malignant neoplasm recto-sigmoid  
 Malignant neoplasm rectum  
 Malignant neoplasm stomach, except cardia  
 Peritoneal carcinomatosis (HIPEC)  
 Other malignant neoplasm abdomen  
 Malignant melanoma of the skin  
 Malignant neoplasm soft tissue  
 Hodgkin's Disease, non-Hodgkin  
 Germ cell tumor  
 Neuroblastoma  
 Metastasis bone  
 Malignant neoplasm bone (except metastasis)  
 Malignant neopl liver (including metastasis)  
 Wilm's tumor  
 Metastasis in bone  
 Malignant bone  
 Malignant soft tissue  
 Renal/adrenal tumor  
 Lymphnode renal tumor  
 Ureteral tumor  
 Bladder tumor  
 Prostate carcinoma  
 Lymph node prostate carcinoma  
 Prostate carcinoma (orchidectomy)  
 Penis carcinoma  
 Testicular tumor  
 Lymph node testicular tumor  
 Urethral tumor  
 Lymph node urethral tumor  
 Lymph node bladder tumor  
 Lymph node penis carcinoma  
 Malignancy vulva  
 Malignancy vagina  
 Malignancy cervix  
 Malignancy endometrium  
 Malignancy myometrium  
 Malignancy ovary / fallopian tubes  
 Malignancy other  
 Malignancy thyroid  
 Malignancy adrenal gland  
 Malignancy, small-cell carcinoma bronchus  
 Malignancy, non-small cell carcinoma  
 bronchus  
 Malignancy thymoma  
 Malignancy pleura  
 Other malignancy thorax  
 Hodgkin lymphoma  
 Non-Hodgkin lymphoma low-grade  
 Non-Hodgkin lymphoma intermediary/high-  
 grade  
 Multiple myeloma/primary amyloidosis

Acute lymphatic leukemia  
 Chronic lymphatic leukemia, Waldenström's,  
 Hairycell  
 Acute myeloid leukemia/RAEB-t  
 Chronic myeloid leukemia  
 Malignancy head-neck  
 Malignancy central nervous system (primary)  
 Malignancy breast  
 Malignancy ovary  
 Malignancy cervix  
 Malignancy endometrium  
 Malignancy testicle  
 Malignancy prostate  
 Malignancy urinary tract  
 Malignancy kidney/renal cell carcinoma  
 Other malignancies urogenital tract  
 Malignancy bone and joint cartilage  
 Malignancy skin/melanoma  
 Malignancy soft tissue  
 Malignancy other  
 Malignancy esophagus/cardia  
 Malignancy stomach (except cardia)  
 Malignancy pancreas  
 Other malignancies digestive tracts  
 Esophagus/cardia malignancy  
 Stomach carcinoma, except carcinoma of the  
 cardia  
 Lymphoma  
 Colorectal malignancy  
 Malignancy in liver  
 Cholangiocarcinoma  
 Tumors non-small cell lung cancer  
 Tumors small cell lung cancer  
 Mesothelioma  
 Mediastinal tumors  
 Metastases of malignancy elsewhere  
 Primary malignant neoplasm intracerebral  
 Secondary malignant neoplasm intracerebral  
 Secondary neoplasm extracerebral  
 (metastasis)  
 Secondary neoplasm intraspinal (metastasis)  
 Secondary neoplasm  
 extraspinal/epidural/spine (metastasis)  
 Primary leptomas malignant  
 Secondary leptomas malignant

Liver disease  
 Viral hepatitis (except hepatitis B)  
 Alcoholic liver disease  
 Drug-induced hepatitis  
 Autoimmune hepatitis  
 Hepatitis B/C

Liver cirrhosis compensated  
Liver cirrhosis decompensated  
Hepatitis general  
Hepatitis B/C with antiviral therapy  
Primary biliary cholangitis, primary sclerosing  
cholangitis and autoimmune hepatitis  
Cirrhosis compensated  
Cirrhosis decompensated  
Metabolic liverdisease  
Acute liverfailure

#### Diabetes

DM without secondary complications  
DM with secondary complications  
DM chronical pump therapy  
Diabetes mellitus  
Diabetes Mellitus

#### Pulmonary disease

COPD  
Asthma, COPD, emphysema  
Asthma  
COPD  
Cystic Fibrosis  
COPD

#### Congestive heartfailure

Congestive heartfailure  
Acute heartfailure  
Chronic heartfailure  
Congestive heartfailure

#### Cerebrovascular disease

Cerebrovascular accident/transient ischemic  
attack  
Intracerebral bleeding  
Ischemic stroke  
TIA (including amaurosis fugax)  
CVA/TIA

#### Chronic renal disease

Chronic renal insufficiency eGFR 30-60ml/min  
Chronic renal insufficiency eGFR<30ml/min  
Continuous ambulatory peritoneal dial (CAPD)  
Automatic peritoneal dialysis (APD)  
Chronic hemodialysis home  
Chronic hemodialysis in healthcare institution

#### Neurologic disease

Parkinson's Disease  
ALS  
Multiple sclerosis

Myasthenia gravis + myasthenic syndromes  
Other neuromuscular disease  
Parkinson's / Parkinsonism

#### Impaired immunity

Intestine transplantation procedure recipient  
Islet cell transplantation procedure recipient  
Liver transplantation procedure recipient  
Partial liver transplantation procedure  
recipient  
Kidney transplantation procedure recipient  
Kidney-pancreas transplantation procedure  
recipient  
Pancreas transplantation procedure recipient  
Liver-kidney transplantation procedure  
recipient  
Liver-pancreas transplantation procedure  
recipient  
Liver-pancreas-intestine transplantation  
procedure recipient  
Intestine transplantation procedure recipient  
Islet cell transplantation procedure recipient  
Liver transplantation procedure recipient  
Partial liver transplantation procedure  
recipient  
Kidney transplantation procedure recipient  
Kidney-pancreas transplantation procedure  
recipient  
Pancreas transplantation procedure recipient  
Liver-kidney transplantation procedure  
recipient  
Liver-pancreas transplantation procedure  
recipient  
Liver-pancreas-intestine transplantation  
procedure recipient  
Intestine transplantation procedure recipient  
Liver transplantation procedure recipient  
Partial liver transplantation procedure  
recipient  
Liver-kidney transplantation procedure  
recipient  
Liver-pancreas transplantation procedure  
recipient  
Liver-pancreas-intestine transplantation  
procedure recipient  
Heart transplantation  
Lung transplantation  
Heart-lung transplantation  
Ulcerative colitis  
Crohn's Disease (enteritis regionalis)  
Ankylosing spondylitis  
Sarcoidosis

Behcet's disease  
 Psoriatic arthritis  
 Ankylosing spondylitis  
 Reumatoid arthritis  
 SLE/MCTD  
 (dermato)Myositis  
 Sjögren's syndrome  
 Scleroderma, CREST syndrome  
 Systemic vasculitis  
 Allergic, IgA vasculitis  
 Crohn's Disease  
 Ulcerative colitis  
 Crohn's Disease  
 Ulcerative colitis  
 Reumatoid arthritis  
 Psoriatic arthritis (mainly peripheral)  
 Still's disease, Adult onset  
 Ankylosing spondylitis  
 Psoriatic arthritis (mainly axial)  
 SLE  
 Cutaneous LE  
 CREST syndrome  
 Scleroderma  
 MCTD  
 Poly- / Dermatomyositis  
 PAN / microscopic polyangiitis  
 Granulomatosis with polyangiitis  
 Sarcoidosis  
 Amyloidosis (primary/secondary)  
 Polychondritis, recurring  
 Behcet's disease  
 Takayasu's arteritis  
 Eosinophilic granulomatosis with polyangiitis

Atherosclerosis limbs/peripheral artery disease  
 Chronic care patient cardiovascular risk factors  
 Angina pectoris, stable  
 Angina pectoris, unstable  
 ST elevation myocardial infarction  
 Non-ST elevation myocardial infarction  
 Arterial abnormality / stenosis  
 Follow-up after acute coronary syndrome  
 Follow-up after PCI and/or CABG  
 Follow-up after pacemaker implantation  
 Follow-up ICD after implantation/external defibrillator  
 Pacemaker implantation  
 AICD implantation  
 CABG, venous graft, maximum 1 arterial graft  
 CABG (>=2 arterial grafts)  
 CABG (1 art) + MVR  
 CABG (1 art) + AVR  
 Left ventricle plasty+CABG  
 CABG + MPL +/- TPL  
 CABG (2 art) + MVR  
 CABG (1art) + AVR + MVR  
 CABG (2 art) + AVR  
 CABG + HOCCM  
 VT + CABG  
 Maze + CABG  
 VSR + CABG  
 MPL + AVR + CABG  
 MPL + CABG (2 art)  
 AVR + CABG + HOCCM  
 Aortic root + CABG  
 Aortic dissection +/- CABG  
 Ascending aorta + CABG  
 Aortic root + CABG + MPL/MVR  
 Maze+CABG of AVR+MPL +/- TPL  
 Implantation LVAD  
 Carotid endarterectomy (CEA)  
 CEA bilateral

Cardiovascular disease

PAOD arm  
 PAOD 2, intermittend claudication  
 PAOD 3, rest pain  
 PAOD 4, gangrene

**Medication**

The use of medication was included if a patient was issued at least two gifts within a year prior to the start of their pneumonia registration code, in order to only include chronic users.

**Diabetes medication**

|                   |                                      |
|-------------------|--------------------------------------|
| Insulin (human)   | Insulin lispro                       |
| Insulin lispro    | Insulin aspart                       |
| Insulin aspart    | Insulin degludec with insulin aspart |
| Insulin glulisine | Insulin glargine                     |
| Insulin (human)   | Insulin detemir                      |
| Insulin (human)   | Insulin degludec                     |

Insulin glargine with lixisenatide  
Insulin degludec with liraglutide  
Insulin (human)  
Metformin  
Glibenclamide  
Tolbutamide  
Gliclazide  
Glimepiride  
Metformin with sulfonylureas  
Metformin with pioglitazone  
Metformin with sitagliptin  
Metformin with vildagliptin  
Metformin with saxagliptin  
Metformin with linagliptin  
Metformin with dapagliflozin  
Metformin with canagliflozin  
Metformin with empagliflozin  
Metformin with ertugliflozin

Acarbose  
Pioglitazone  
Sitagliptin  
Vildagliptin  
Saxagliptin  
Linagliptin  
Exenatide  
Liraglutide  
Lixisenatide  
Dulaglutide  
Semaglutide  
Dapagliflozin  
Canagliflozin  
Empagliflozin  
Ertugliflozin  
Repaglinide  
Other blood glucose lowering medication,  
excluding insulins

### **Immunosuppressants**

Mycophenolic acid (Cellcept<sup>®</sup>)  
Sirolimus (Rapamune<sup>®</sup>)  
Leflunomide (Arava<sup>®</sup>)  
Everolimus (Certican<sup>®</sup>)  
Fingolimod (Gilenya<sup>®</sup>)  
Teriflunomide (Aubagio<sup>®</sup>)  
Ozanimod (Zeposia<sup>®</sup>)  
Cladribine (Mavenclad<sup>®</sup>)  
Daclizumab  
Ciclosporin (Neoral<sup>®</sup>)  
Tacrolimus (Prograft<sup>®</sup>)  
Azathioprine (Imuran<sup>®</sup>)  
Methotrexate (Injexate<sup>®</sup>)  
Pirfenidone (Esbriet<sup>®</sup>)  
Dimethyl fumarate (Tecfidera<sup>®</sup>)  
Dupilumab  
Everolimus  
Natalizumab  
Abatacept  
Eculizumab  
Belimumab  
Belatacept  
Tofacitinib  
Apremilast  
Vedolizumab  
Alemtuzumab  
Ocrelizumab  
Baricitinib  
Upadacitinib  
Etanercept  
Infliximab

Adalimumab  
Certolizumab pegol  
Golimumab  
Anakinra  
Ustekinumab  
Tocilizumab  
Canakinumab  
Secukinumab  
Siltuximab  
Brodalumab  
Ixekizumab  
Sarilumab  
Guselkumab  
Tildrakizumab  
Interleukine inhibitors  
Pimecrolimus  
Mercaptopurine  
Tioguanine  
Fludarabine  
Clofarabine  
Nelarabine  
Thymocytoglobulin  
Filgotinib  
Pomalidomide  
Rituximab  
Basiliximab  
Prednisone  
Dexamethasone  
Methylprednisolone

**Supplementary table 1.** Multilevel analysis of outcomes of patients with community-acquired pneumonia using CURB-65 versus PSI, including academic hospitals

|                                          | <b>CURB-65<br/>(N = 22877)</b> | <b>PSI<br/>(N = 17279)</b> | <b>Unadjusted OR<br/>(95% CI)</b> | <b>Adjusted OR<br/>(95% CI)</b> |
|------------------------------------------|--------------------------------|----------------------------|-----------------------------------|---------------------------------|
| Admission, N (%)                         | 17,307 (75.7)                  | 13,807 (79.9)              | <b>0.67 (0.51-0.89)</b>           | 0.80 (0.64-1.01)                |
| Readmission <sup>a</sup> , N (%)         | 439 (2.5)                      | 329 (2.3)                  | 1.05 (0.88-1.25)                  | 1.03 (0.86-1.23)                |
| Delayed admission <sup>b</sup> , % N (%) | 404 (7.3)                      | 275 (7.9)                  | 0.90 (0.73-1.11)                  | 0.97 (0.79-1.19)                |
| ICU admission <sup>c</sup> , N (%)       | 2,053 (9.0)                    | 1,395 (8.1)                | 1.14 (0.97-1.35)                  | 1.14 (0.97-1.35)                |
| 30-day mortality <sup>c</sup> , % N (%)  | 1,955 (8.5)                    | 1,682 (9.7)                | <b>0.87 (0.80-0.95)</b>           | <b>0.89 (0.82-0.96)</b>         |

a. Percentage out of the total number of (delayed) admissions

b. Percentage out of the total number of initial outpatients

c. Percentage out of the total number of patients

Readmission was defined as patients who were discharged from the hospital but readmitted within 7 days. Delayed admission was defined as ED pneumonia patients initially treated as outpatients, but who were admitted to the hospital within 7 days. PSI: Pneumonia Severity Index

**Supplementary table 2.** Multilevel analysis of outcomes of patients with community-acquired pneumonia using either CURB-65 or PSI versus no-consensus hospitals, including academic hospitals

|                                        | <b>Consensus<br/>(PSI or CURB-65)<br/>(N = 40,156)</b> | <b>No consensus<br/>(N = 13476)</b> | <b>Unadjusted OR<br/>(95% CI)</b> | <b>Adjusted OR<br/>(95% CI)</b> |
|----------------------------------------|--------------------------------------------------------|-------------------------------------|-----------------------------------|---------------------------------|
| Admission, N (%)                       | 31,114 (77.5)                                          | 10,944 (81.2)                       | <b>0.73 (0.55-0.96)</b>           | <b>0.73 (0.59-0.91)</b>         |
| Readmission <sup>a</sup> , N (%)       | 768 (2.4)                                              | 253 (2.3)                           | 1.07 (0.90-1.27)                  | 1.07 (0.90-1.27)                |
| Delayed admission <sup>b</sup> , N (%) | 679 (7.5)                                              | 204 (8.1)                           | 0.93 (0.75-1.14)                  | 0.94 (0.77-1.15)                |
| ICU admission <sup>c</sup> , N (%)     | 3,448 (8.6)                                            | 1,168 (8.7)                         | 0.96 (0.82-1.13)                  | 0.97 (0.83-1.13)                |
| 30-day mortality <sup>c</sup> , N (%)  | 3,637 (9.1)                                            | 1,217 (9.0)                         | 1.02 (0.93-1.12)                  | 1.05 (0.96-1.13)                |

a. Percentage out of the total number of (delayed) admissions

b. Percentage out of the total number of outpatients

c. Percentage out of the total number of patients

Consensus was defined as a hospital where both the internal and pulmonology department reported the use of the same prognostic score (Either PSI or CURB-65). Readmission was defined as patients who were discharged from the hospital but readmitted within 7 days. Delayed admission was defined as patients initially treated as outpatients, but who were admitted to the hospital within 7 days.

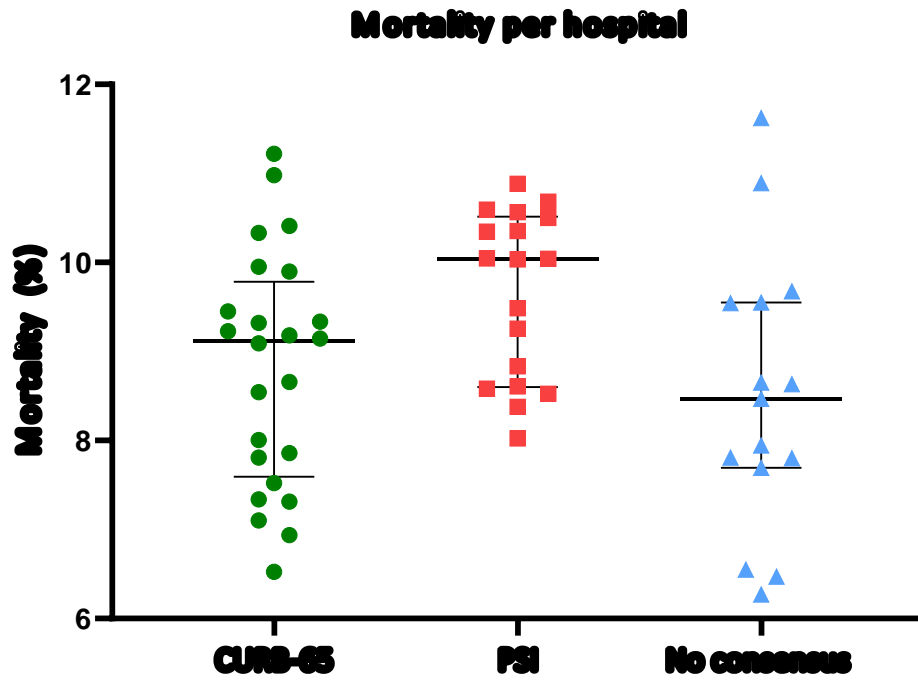

Supplementary figure 1. 30-day mortality with median and interquartile range for all individual hospitals that treated at least 200 individual CAP patients (n=57), grouped by use of prognostic score.
